# Supplementary material for: Application of Silver-Loaded Composite Track-Etched Membranes for Photocatalytic Decomposition of Methylene Blue under Visible Light
Source: PubMed Central journal article supplement (PMC7830284; doi:10.3390/membranes11010060), 2021-01-15
Supplement: membranes-11-00060-s001.pdf [file membranes-11-00060-s001.pdf]

Supplementary information

# Application of Silver Loaded Composite Track-Etched Membranes for Photocatalytic Decomposition of Methylene Blue under Visible Light

Anastassiya A. Mashentseva <sup>1,\*</sup>, Murat Barsbay <sup>2</sup>, Nurgulim A. Aimanova <sup>1,3</sup> and Maxim V. Zdorovets <sup>1,3,4</sup>

<sup>1</sup> The Institute of Nuclear Physics of the Republic of Kazakhstan, Ibragimov str., 1, 050032, Almaty, Kazakhstan; a.mashentseva@inp.kz (A.A.M.); nurgulim.a.a@gmail.com (N.A.A.); mzdorovets@gmail.com (M.V.Z.)

<sup>2</sup> Department of Chemistry, Hacettepe University, 06800 Beytepe, Ankara, Turkey  
mbarsbay@hacettepe.edu.tr

<sup>3</sup> L.N. Gumilyov Eurasian National University, Satpaev str., 5, 010008, Nur-Sultan, Kazakhstan

<sup>4</sup> The Ural Federal University named after the first President of Russia B. N. Yeltsin, Mira str. 19, 620002 Yekaterinburg, Russia; <https://urfu.ru/en/>

\* Correspondence: a.mashentseva@inp.kz; Tel.: +7-707-322-4399

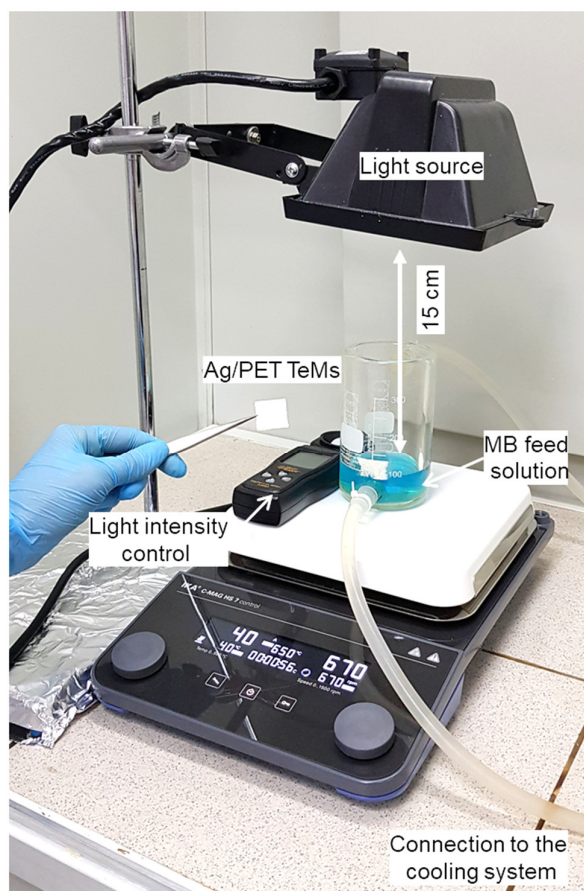

**Figure S1.** Lab setup for the silver loaded polyethylene terephthalate (Ag/PET) composite track-etched membranes (TeMs) catalytic activity examination.

**Table S1.** The equation of the regression line and corresponding coefficient of determinations for the methylene blue (MB) decomposition reaction in the presence of the silver loaded polyethylene terephthalate (Ag/PET) composite track-etched membranes (TeMs).

| <b>MB concentration, mg/l</b> | <b>Regression equation</b> | <b>Coefficients of determinations<br/>R<sup>2</sup></b> |
|-------------------------------|----------------------------|---------------------------------------------------------|
| 0.1                           | $y = 0.0254x$              | 0.94                                                    |
| 0.5                           | $y = 0.0269x$              | 0.95                                                    |
| 1.0                           | $y = 0.0154x$              | 0.95                                                    |
| 3.0                           | $y = 0.0099x$              | 0.97                                                    |
| 5.0                           | $y = 0.0049x$              | 0.98                                                    |
